# Supplementary material for: The impact of the COVID-19 pandemic on a cohort of Labrador Retrievers in England
Source: Research Square preprint supplement (doi:10.21203/rs.3.rs-1238396/v1), 2022-02-11
Supplement: Supplementary file [file 42c5a89873d45dcd014b627f.pdf]

File name: Additional file 1

File format: PDF

Title: Model selection, diagnostics, fit and full output.

Description: A file containing supplementary tables and figures showing the model selection process, model diagnostics and fit and the full output of models' estimates fitted to variables of interest relating to Dogslife dogs' lifestyle, routine care and insurance status

Table S1: Model fit indicators for models fitted to variables of interest relating to lifestyle, routine care and insurance status

| Variable of interest and model distribution | AIC/RMSE/<br>AUC with 95% CI | Linear mixed models     | General additive mixed models with a smooth term for dog age |
|---------------------------------------------|------------------------------|-------------------------|--------------------------------------------------------------|
| Exercise quantity<br>(Gaussian)             | AIC                          | 162514.3                | 161161.0                                                     |
|                                             | RMSE                         | 62.11                   | 58.58                                                        |
| Dried food quantity<br>(Gaussian)           | AIC                          | 154150.5                | 153519.7                                                     |
|                                             | RMSE                         | 66.54                   | 64.85                                                        |
| Insurance status<br>(Binomial)              | AIC                          | 5372.90                 | 5374.91                                                      |
|                                             | AUC<br>95% CI:               | 99.53%<br>99.47%-99.6%  | 99.53%<br>99.47%-99.6%                                       |
| Titbits status<br>(Binomial)                | AIC                          | 10245.13                | 10095.53                                                     |
|                                             | AUC<br>95% CI:               | 97.10%<br>96.86%-97.35% | 97.34%<br>97.09%-97.58%                                      |
| Sleep-person status<br>(Binomial)           | AIC                          | 6595.422                | 6337.928                                                     |
|                                             | AUC<br>95% CI:               | 99.42%<br>99.34%-99.50% | 99.50%<br>99.43%-99.58%                                      |
| Bathed SLV*<br>(Binomial)                   | AIC                          | 16316.16                | 16089.51                                                     |
|                                             | AUC<br>95% CI:               | 91.47%<br>91.01%-91.93% | 92.11%<br>91.67%-92.55%                                      |
| Anti-parasitic SLV*<br>(Binomial)           | AIC                          | 16909.3                 | 16755.66                                                     |
|                                             | AUC<br>95% CI:               | 89.56%<br>89.03%-90.09% | 89.56%<br>89.03%-90.09%                                      |
| Wormed SLV*<br>(Binomial)                   | AIC                          | 17992.42                | 17841.94                                                     |
|                                             | AUC<br>95% CI:               | 84.96%<br>84.31%-85.6%  | 84.96%<br>84.31%-85.6%                                       |
| Vaccinated SLV*<br>(Binomial)               | AIC                          | 15503.27                | 13210.2                                                      |
|                                             | AUC<br>95% CI:               | 88.59%<br>88.02%-89.15% | 88.65%<br>88.06%-89.24%                                      |

The Akaike information criterion (AIC) and the root-mean-square error (RMSE) of gaussian models and the AIC and percentage area under the curve (AUC) with 95% confidence interval (CI) of binomial models (with logit links) fitted to variables of interest, for comparing the COVID-19 restrictions study period (March 23rd to July 4<sup>th</sup> 2020) to data in the same date range in previous years (March 23rd to July 4<sup>th</sup>, 2011 to 2019) and adjusted for age, sex and individual effects. \*Since the owner's last visit to the Dogslife website (SLV)

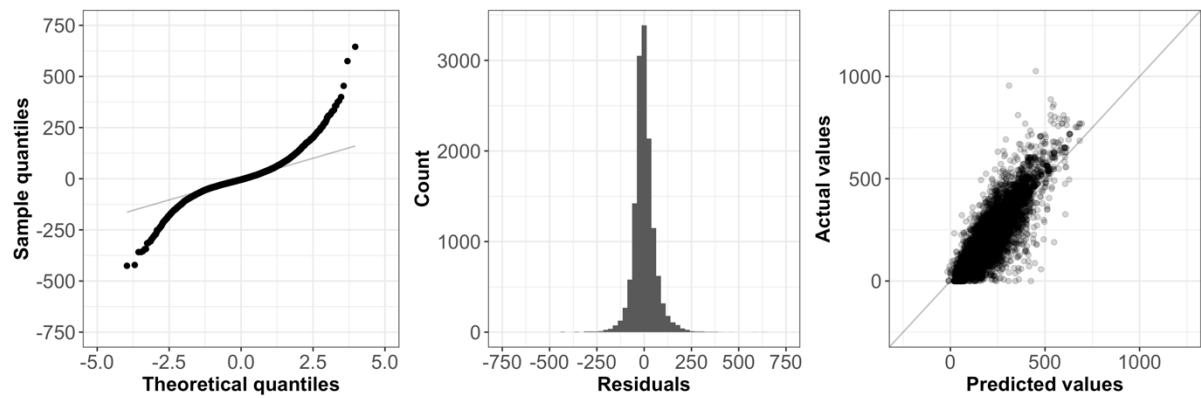

Figure S1: Diagnostic plots for a general additive model fitted to Dogslife dogs' exercise quantity. The quantile-quantile plot, residual histogram and predicted VS actual plots for a general additive model fitted to the exercise quantity (minutes per week) of Dogslife dogs, for comparing the COVID-19 restrictions study period (March 23<sup>rd</sup> to July 4<sup>th</sup> 2020) to data in the same date range in previous years (March 23<sup>rd</sup> to July 4<sup>th</sup>, 2011 to 2019) and adjusted for age, sex and individual effects

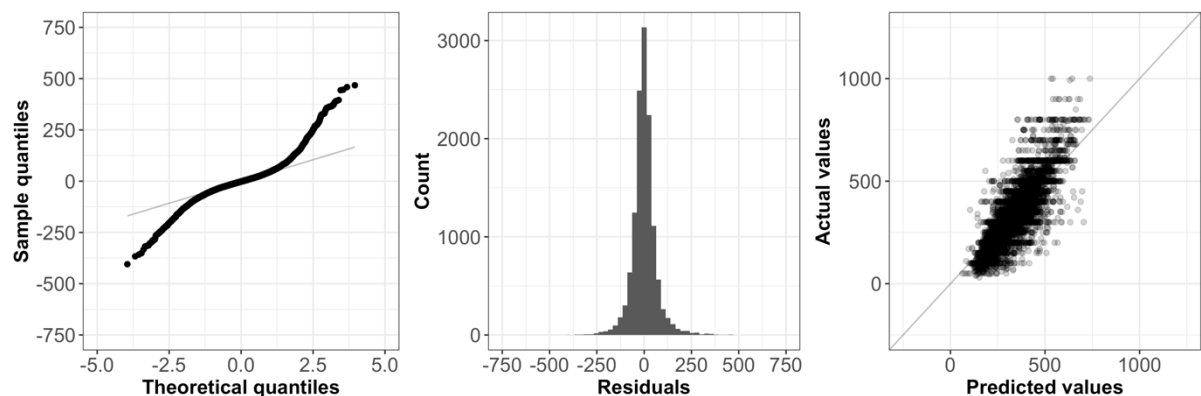

Figure S2: Diagnostic plots for a general additive model fitted to Dogslife dogs' dried food quantity. The quantile-quantile plot, residual histogram and predicted VS actual plots for a general additive model fitted to the dried food quantity (grams per day) of Dogslife dogs, for comparing the COVID-19 restrictions study period (March 23<sup>rd</sup> to July 4<sup>th</sup> 2020) to data in the same date range in previous years (March 23<sup>rd</sup> to July 4<sup>th</sup>, 2011 to 2019) and adjusted for age, sex and individual effects

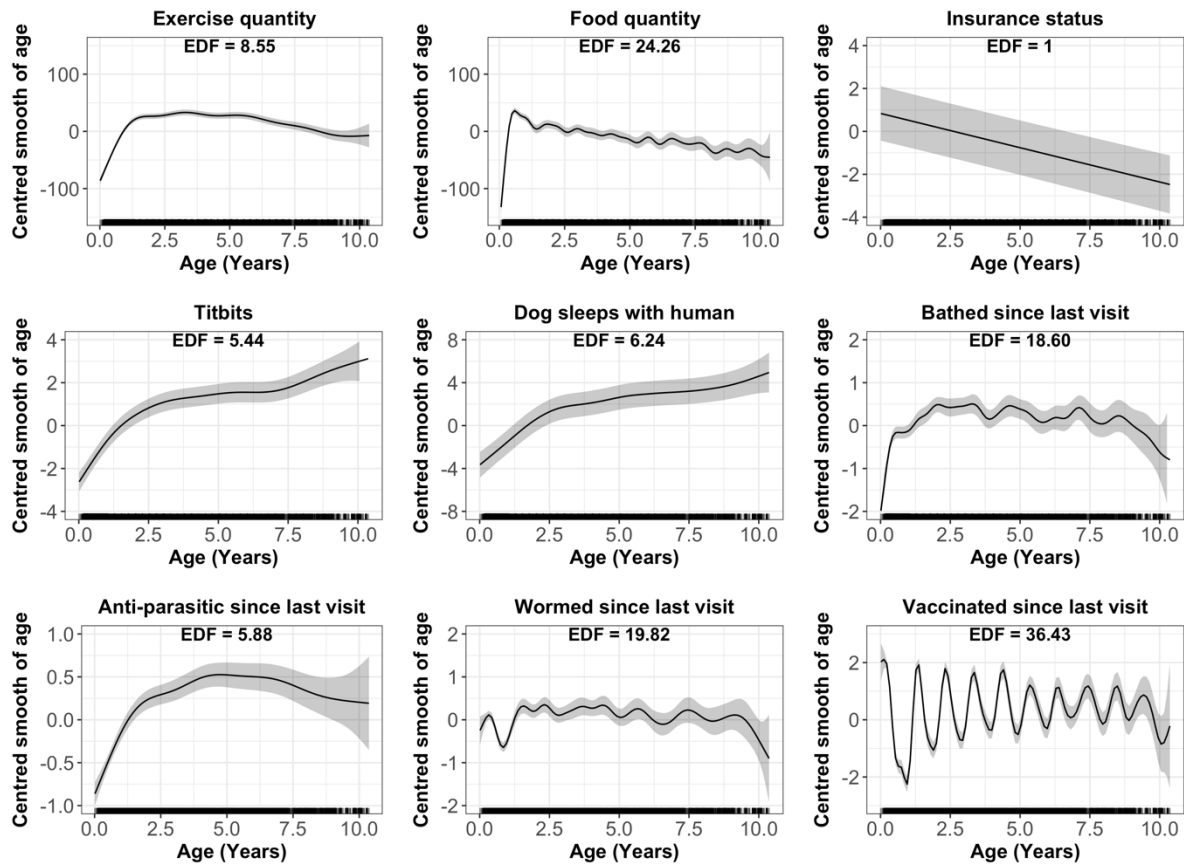

Figure S3: General additive model curves fitted to variables of interest. The fitted smoothed general additive models' curves for dog age and their estimated degrees of freedom (EDF) fitted to variables of interest, for comparing the COVID-19 restrictions study period (March 23<sup>rd</sup> to July 4<sup>th</sup> 2020) to data in the same date range in previous years (March 23<sup>rd</sup> to July 4<sup>th</sup>, 2011 to 2019) and adjusted for age, sex and individual effects

Table S5: Parameter estimates for general additive models fitted to variables of interest

| Variable of interest and model distribution | Predictors                         | BC/OR | 95% CI        | P-Value |
|---------------------------------------------|------------------------------------|-------|---------------|---------|
| Exercise quantity (Gaussian)                | COVID-19 restrictions study period | 6.89  | 1.65 – 12.13  | 0.010   |
|                                             | Sex of dog is male                 | 4.89  | -1.61 – 11.38 | 0.140   |
|                                             | Smoothed age of dogs               | ---   | ---           | <0.001  |
| Dried food quantity (Gaussian)              | COVID-19 restrictions study period | -0.88 | -6.69 – 4.93  | 0.766   |
|                                             | Sex of dog is male                 | 39.71 | 33.07 – 46.35 | <0.001  |
|                                             | Smoothed age of dogs               | ---   | ---           | <0.001  |
| Insurance status (Binomial)                 | COVID-19 restrictions study period | 0.59  | 0.39 – 0.90   | 0.015   |
|                                             | Sex of dog is male                 | 1.59  | 0.81 – 3.12   | 0.181   |
|                                             | Smoothed age of dogs               | ---   | ---           | <0.001  |
| Titbits status (Binomial)                   | COVID-19 restrictions study period | 0.36  | 0.24 – 0.52   | <0.001  |
|                                             | Sex of dog is male                 | 1.02  | 0.69 – 1.53   | 0.908   |
|                                             | Smoothed age of dogs               | ---   | ---           | <0.001  |
| Sleep-person status (Binomial)              | COVID-19 restrictions study period | 1.07  | 0.68 – 1.68   | 0.771   |
|                                             | Sex of dog is male                 | 2.39  | 1.18 – 4.86   | 0.016   |
|                                             | Smoothed age of dogs               | ---   | ---           | <0.001  |
| Bathed SLV* (Binomial)                      | COVID-19 restrictions study period | 0.99  | 0.82 – 1.20   | 0.958   |
|                                             | Sex of dog is male                 | 1.31  | 1.12 – 1.53   | 0.001   |
|                                             | Smoothed age of dogs               | ---   | ---           | 0.017   |
| Anti-parasitic SLV* (Binomial)              | COVID-19 restrictions study period | 1.00  | 0.84 – 1.20   | 0.990   |
|                                             | Sex of dog is male                 | 1.00  | 0.88 – 1.14   | 0.964   |
|                                             | Smoothed age of dogs               | ---   | ---           | 0.003   |
| Wormed SLV* (Binomial)                      | COVID-19 restrictions study period | 1.20  | 1.02 – 1.40   | 0.028   |
|                                             | Sex of dog is male                 | 0.98  | 0.88 – 1.09   | 0.706   |
|                                             | Smoothed age of dogs               | ---   | ---           | 0.841   |
| Vaccinated SLV* (Binomial)                  | COVID-19 restrictions study period | 0.70  | 0.58 – 0.83   | <0.001  |
|                                             | Sex of dog is male                 | 1.13  | 1.00 – 1.27   | 0.051   |
|                                             | Smoothed age of dogs               | ---   | ---           | 0.270   |

General additive model estimates for the beta coefficient (BC) (for gaussian models) or odds ratios (OR) (for binomial models), 95% confidence interval (CI) and P-values, fitted to variables of interest, for comparing the COVID-19 restrictions study period (March 23<sup>rd</sup> to July 4<sup>th</sup> 2020) to data in the same date range in previous years (March 23<sup>rd</sup> to July 4<sup>th</sup>, 2011 to 2019) and adjusted for age, sex and individual effects
